# Supplementary material
Source: MDPI journal article supplement (https://www.mdpi.com/2571-6255/6/2/52)
Supplement: s1 [file s1]

## Supplementary 1. ANOVAs

### Descriptives plots

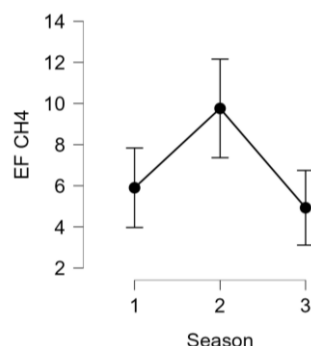

### ANOVA

One-way ANOVA for CH<sub>4</sub>  
means by season, using n=86 (CO<sub>2</sub> outlier removed).

#### ANOVA - EF CH<sub>4</sub>

| Cases     | Sum of Squares | df | Mean Square | F     | p     | $\eta^2$ | $\omega^2$ |
|-----------|----------------|----|-------------|-------|-------|----------|------------|
| Season    | 401.024        | 2  | 200.512     | 6.639 | 0.002 | 0.138    | 0.116      |
| Residuals | 2506.752       | 83 | 30.202      |       |       |          |            |

Note. Type III Sum of Squares

**Figure S1.** ANOVA for Methane Emission Factor by Season.

### Descriptives plots

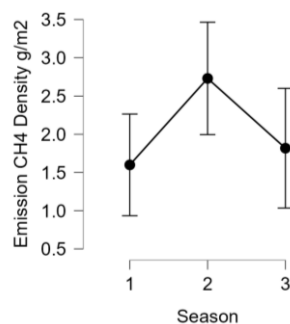

### ANOVA

One-way ANOVA for CH<sub>4</sub>  
means by season, using n=86 (CO<sub>2</sub> outlier removed).

#### ANOVA - Emission CH<sub>4</sub> Density g/m<sup>2</sup>

| Cases     | Sum of Squares | df | Mean Square | F     | p     | $\eta^2$ | $\omega^2$ |
|-----------|----------------|----|-------------|-------|-------|----------|------------|
| Season    | 20.621         | 2  | 10.310      | 2.686 | 0.074 | 0.061    | 0.038      |
| Residuals | 318.599        | 83 | 3.839       |       |       |          |            |

Note. Type III Sum of Squares

**Figure S2.** ANOVA for Methane Emission Density by Season.

## Supplementary 2. Pearson's Correlations

Tables S1–S16. Methane EF and ED Correlations for Key Variables by Fire Type and Season ( $n = 86$ ).

**Table S1.** Methane EF Correlations for Key Variables for All Fires.

EF CH4 and Byram\_act\_dry: grass\_biomass\_%, m/s, Total Moisture, Wind\_Speed (m/s), ambient\_temp, humidity, everything that went into the regression with Y as EF CH4. No transformed variables.

## Pearson's Correlations

| Variable               |             | EF CH4   | MCE      | Log Byram Intensity | 2.2- Grass % | True CC   | Log Humidity | Eff_Visual (BE) | Log total moisture | Wind_speed (m/s) | ambient_temp |
|------------------------|-------------|----------|----------|---------------------|--------------|-----------|--------------|-----------------|--------------------|------------------|--------------|
| 1. EF CH4              | Pearson's r | —        |          |                     |              |           |              |                 |                    |                  |              |
|                        | p-value     | —        |          |                     |              |           |              |                 |                    |                  |              |
| 2. MCE                 | Pearson's r | 0.467*** | —        |                     |              |           |              |                 |                    |                  |              |
|                        | p-value     | < .001   | —        |                     |              |           |              |                 |                    |                  |              |
| 3. Log Byram Intensity | Pearson's r | -0.133   | -0.226*  | —                   |              |           |              |                 |                    |                  |              |
|                        | p-value     | 0.220    | 0.036    | —                   |              |           |              |                 |                    |                  |              |
| 4. 2.2- Grass %        | Pearson's r | 0.027    | 0.167    | 0.048               | —            |           |              |                 |                    |                  |              |
|                        | p-value     | 0.804    | 0.124    | 0.658               | —            |           |              |                 |                    |                  |              |
| 5. True CC             | Pearson's r | -0.126   | -0.260*  | 0.606***            | 0.081        | —         |              |                 |                    |                  |              |
|                        | p-value     | 0.248    | 0.016    | < .001              | 0.461        | —         |              |                 |                    |                  |              |
| 6. Log Humidity        | Pearson's r | 0.242*   | 0.506*** | -0.219*             | -0.164       | -0.044    | —            |                 |                    |                  |              |
|                        | p-value     | 0.025    | < .001   | 0.042               | 0.132        | 0.690     | —            |                 |                    |                  |              |
| 7. Eff_Visual (BE)     | Pearson's r | 3.218e-4 | -0.280** | 0.216*              | -0.029       | 0.256*    | -0.257*      | —               |                    |                  |              |
|                        | p-value     | 0.998    | 0.009    | 0.046               | 0.790        | 0.017     | 0.017        | —               |                    |                  |              |
| 8. Log total moisture  | Pearson's r | 0.220*   | 0.235*   | -0.415***           | 0.047        | -0.383*** | 0.486***     | -0.132          | —                  |                  |              |
|                        | p-value     | 0.042    | 0.029    | < .001              | 0.665        | < .001    | < .001       | 0.227           | —                  |                  |              |
| 9. Wind_speed (m/s)    | Pearson's r | 0.391*** | 0.202    | -0.021              | 0.081        | 0.038     | 0.082        | -0.059          | 0.161              | —                |              |
|                        | p-value     | < .001   | 0.096    | 0.864               | 0.509        | 0.756     | 0.504        | 0.629           | 0.188              | —                |              |
| 10. ambient_temp       | Pearson's r | -0.244*  | -0.219*  | 0.111               | 0.076        | 0.005     | -0.505***    | 0.280**         | -0.454***          | -0.428***        | —            |
|                        | p-value     | 0.023    | 0.043    | 0.310               | 0.488        | 0.964     | < .001       | 0.009           | < .001             | < .001           | —            |

\* p < .05, \*\* p < .01, \*\*\* p < .001

**Table S2.** Methane EF Correlations for Key Variables for Head Fires.

Head Fires EF CH4 and Byram\_act\_dry: grass\_biomass\_%, m/s, Total Moisture, Wind\_Speed (m/s), ambient\_temp, humidity, everything that went into the regression with Y as EF CH4. No transformed variables.

## Pearson's Correlations

| Variable               |             | EF CH4  | MCE     | Log Byram Intensity | 2.2- Grass % | True CC | Log Humidity | Eff_Visual (BE) | Log total moisture | Wind_speed (m/s) | ambient_temp |
|------------------------|-------------|---------|---------|---------------------|--------------|---------|--------------|-----------------|--------------------|------------------|--------------|
| 1. EF CH4              | Pearson's r | —       |         |                     |              |         |              |                 |                    |                  |              |
|                        | p-value     | —       |         |                     |              |         |              |                 |                    |                  |              |
| 2. MCE                 | Pearson's r | 0.467** | —       |                     |              |         |              |                 |                    |                  |              |
|                        | p-value     | 0.005   | —       |                     |              |         |              |                 |                    |                  |              |
| 3. Log Byram Intensity | Pearson's r | -0.109  | -0.142  | —                   |              |         |              |                 |                    |                  |              |
|                        | p-value     | 0.535   | 0.416   | —                   |              |         |              |                 |                    |                  |              |
| 4. 2.2- Grass %        | Pearson's r | 0.019   | 0.214   | -0.028              | —            |         |              |                 |                    |                  |              |
|                        | p-value     | 0.913   | 0.218   | 0.874               | —            |         |              |                 |                    |                  |              |
| 5. True CC             | Pearson's r | -0.152  | -0.179  | 0.461**             | 0.081        | —       |              |                 |                    |                  |              |
|                        | p-value     | 0.385   | 0.304   | 0.005               | 0.643        | —       |              |                 |                    |                  |              |
| 6. Log Humidity        | Pearson's r | 0.218   | 0.434** | -0.194              | -0.081       | 0.160   | —            |                 |                    |                  |              |
|                        | p-value     | 0.209   | 0.009   | 0.265               | 0.643        | 0.358   | —            |                 |                    |                  |              |
| 7. Eff_Visual (BE)     | Pearson's r | 0.059   | -0.300  | 0.026               | -0.030       | 0.338*  | -0.252       | —               |                    |                  |              |
|                        | p-value     | 0.738   | 0.080   | 0.884               | 0.864        | 0.047   | 0.144        | —               |                    |                  |              |
| 8. Log total moisture  | Pearson's r | 0.154   | 0.070   | -0.496**            | 0.120        | -0.318  | 0.506**      | -0.133          | —                  |                  |              |
|                        | p-value     | 0.378   | 0.689   | 0.002               | 0.491        | 0.062   | 0.002        | 0.447           | —                  |                  |              |
| 9. Wind_speed (m/s)    | Pearson's r | 0.399*  | 0.364   | -0.172              | 0.225        | -0.156  | 0.042        | 0.007           | 0.361              | —                |              |
|                        | p-value     | 0.032   | 0.052   | 0.371               | 0.240        | 0.420   | 0.827        | 0.970           | 0.054              | —                |              |
| 10. ambient_temp       | Pearson's r | -0.425* | -0.247  | 0.044               | 0.138        | 0.114   | -0.412*      | 0.260           | -0.509**           | -0.373*          | —            |
|                        | p-value     | 0.011   | 0.152   | 0.800               | 0.428        | 0.515   | 0.014        | 0.132           | 0.002              | 0.046            | —            |

\* p < .05, \*\* p < .01, \*\*\* p < .001

**Table S3.** Methane EF Correlations for Key Variables for Backfires. Backfires EFCH4 and Byram\_act\_dry; grass\_biomass\_%, Total Moisture, Wind\_Speed (m/s), ambient\_temp, humidity.

| Pearson's Correlations |             | EF CH4   | MCE      | Log Byram Intensity | 2.2- Grass % | True CC  | Log Humidity | Eff_Visual (BE) | Log total moisture | Wind_speed (m/s) | ambient_temp |
|------------------------|-------------|----------|----------|---------------------|--------------|----------|--------------|-----------------|--------------------|------------------|--------------|
| 1. EF CH4              | Pearson's r | —        |          |                     |              |          |              |                 |                    |                  |              |
|                        | p-value     | —        |          |                     |              |          |              |                 |                    |                  |              |
| 2. MCE                 | Pearson's r | 0.470*** | —        |                     |              |          |              |                 |                    |                  |              |
|                        | p-value     | < .001   | —        |                     |              |          |              |                 |                    |                  |              |
| 3. Log Byram Intensity | Pearson's r | -0.162   | -0.363** | —                   |              |          |              |                 |                    |                  |              |
|                        | p-value     | 0.257    | 0.009    | —                   |              |          |              |                 |                    |                  |              |
| 4. 2.2- Grass %        | Pearson's r | 0.035    | 0.125    | 0.049               | —            |          |              |                 |                    |                  |              |
|                        | p-value     | 0.808    | 0.384    | 0.733               | —            |          |              |                 |                    |                  |              |
| 5. True CC             | Pearson's r | -0.117   | -0.304*  | 0.746***            | 0.084        | —        |              |                 |                    |                  |              |
|                        | p-value     | 0.413    | 0.030    | < .001              | 0.557        | —        |              |                 |                    |                  |              |
| 6. Log Humidity        | Pearson's r | 0.261    | 0.562*** | -0.286*             | -0.236       | -0.152   | —            |                 |                    |                  |              |
|                        | p-value     | 0.064    | < .001   | 0.042               | 0.096        | 0.287    | —            |                 |                    |                  |              |
| 7. Eff_Visual (BE)     | Pearson's r | -0.039   | -0.276*  | 0.320*              | -0.036       | 0.224    | -0.264       | —               |                    |                  |              |
|                        | p-value     | 0.785    | 0.050    | 0.022               | 0.804        | 0.114    | 0.061        | —               |                    |                  |              |
| 8. Log total moisture  | Pearson's r | 0.278*   | 0.355*   | -0.501***           | -0.027       | -0.437** | 0.469***     | -0.141          | —                  |                  |              |
|                        | p-value     | 0.048    | 0.010    | < .001              | 0.852        | 0.001    | < .001       | 0.324           | —                  |                  |              |
| 9. Wind_speed (m/s)    | Pearson's r | 0.381*   | 0.119    | 0.124               | -0.006       | 0.133    | 0.120        | -0.097          | 0.019              | —                |              |
|                        | p-value     | 0.015    | 0.466    | 0.446               | 0.972        | 0.412    | 0.462        | 0.553           | 0.907              | —                |              |
| 10. ambient_temp       | Pearson's r | -0.101   | -0.202   | 0.152               | 0.020        | -0.052   | -0.587***    | 0.295*          | -0.413**           | -0.472**         | —            |
|                        | p-value     | 0.480    | 0.154    | 0.285               | 0.889        | 0.715    | < .001       | 0.036           | 0.003              | 0.002            | —            |

\* p &lt; .05, \*\* p &lt; .01, \*\*\* p &lt; .001

**Table S4.** Methane EF Correlations for Key Variables for Early Fires.

EDS EF CH4 and Byram\_act\_dry; grass\_biomass\_%, m/s, Total Moisture, Wind\_Speed (m/s), ambient\_temp, humidity, everything that went into the regression with Y as EF CH4. No transformed variables.

| Pearson's Correlations |             | EF CH4 | MCE      | Log Byram Intensity | 2.2- Grass % | True CC  | Log Humidity | Eff_Visual (BE) | Log total moisture | Wind_speed (m/s) | ambient_temp |
|------------------------|-------------|--------|----------|---------------------|--------------|----------|--------------|-----------------|--------------------|------------------|--------------|
| 1. EF CH4              | Pearson's r | —      |          |                     |              |          |              |                 |                    |                  |              |
|                        | p-value     | —      |          |                     |              |          |              |                 |                    |                  |              |
| 2. MCE                 | Pearson's r | 0.439* | —        |                     |              |          |              |                 |                    |                  |              |
|                        | p-value     | 0.036  | —        |                     |              |          |              |                 |                    |                  |              |
| 3. Log Byram Intensity | Pearson's r | -0.002 | -0.120   | —                   |              |          |              |                 |                    |                  |              |
|                        | p-value     | 0.993  | 0.585    | —                   |              |          |              |                 |                    |                  |              |
| 4. 2.2- Grass %        | Pearson's r | 0.135  | 0.539**  | -0.123              | —            |          |              |                 |                    |                  |              |
|                        | p-value     | 0.539  | 0.008    | 0.576               | —            |          |              |                 |                    |                  |              |
| 5. True CC             | Pearson's r | 0.242  | 0.112    | 0.648***            | 0.249        | —        |              |                 |                    |                  |              |
|                        | p-value     | 0.267  | 0.611    | < .001              | 0.251        | —        |              |                 |                    |                  |              |
| 6. Log Humidity        | Pearson's r | -0.094 | -0.109   | -0.104              | -0.220       | -0.181   | —            |                 |                    |                  |              |
|                        | p-value     | 0.669  | 0.621    | 0.638               | 0.313        | 0.408    | —            |                 |                    |                  |              |
| 7. Eff_Visual (BE)     | Pearson's r | -0.008 | -0.266   | 0.208               | -0.371       | 0.135    | -0.229       | —               |                    |                  |              |
|                        | p-value     | 0.971  | 0.221    | 0.340               | 0.081        | 0.540    | 0.294        | —               |                    |                  |              |
| 8. Log total moisture  | Pearson's r | -0.253 | -0.602** | -0.183              | -0.311       | -0.570** | 0.377        | 0.202           | —                  |                  |              |
|                        | p-value     | 0.244  | 0.002    | 0.404               | 0.149        | 0.005    | 0.077        | 0.355           | —                  |                  |              |
| 9. Wind_speed (m/s)    | Pearson's r | 0.271  | 0.268    | 0.204               | -0.184       | 0.238    | 0.424*       | -0.341          | -0.177             | —                |              |
|                        | p-value     | 0.212  | 0.216    | 0.351               | 0.400        | 0.273    | 0.044        | 0.112           | 0.420              | —                |              |
| 10. ambient_temp       | Pearson's r | 0.089  | 0.131    | 0.039               | 0.383        | 0.203    | -0.879***    | 0.230           | -0.312             | -0.504*          | —            |
|                        | p-value     | 0.686  | 0.551    | 0.861               | 0.071        | 0.352    | < .001       | 0.291           | 0.147              | 0.014            | —            |

\* p &lt; .05, \*\* p &lt; .01, \*\*\* p &lt; .001

**Table S5.** Methane EF Correlations for Key Variables for Middle Fires.

MDS EF CH4 and Byram\_act\_dry; grass\_biomass\_%, m/s, Total Moisture, Wind\_Speed (m/s), ambient\_temp, humidity, everything that went into the regression with Y as EF CH4. No transformed variables.

## Pearson's Correlations

| Variable               |             | EF CH4   | MCE     | Log Byram Intensity | 2.2- Grass % | True CC | Log Humidity | Eff_Visual (BE) | Log total moisture | Wind_speed (m/s) | ambient_temp |
|------------------------|-------------|----------|---------|---------------------|--------------|---------|--------------|-----------------|--------------------|------------------|--------------|
| 1. EF CH4              | Pearson's r | —        |         |                     |              |         |              |                 |                    |                  |              |
|                        | p-value     | —        |         |                     |              |         |              |                 |                    |                  |              |
| 2. MCE                 | Pearson's r | 0.692*** | —       |                     |              |         |              |                 |                    |                  |              |
|                        | p-value     | < .001   | —       |                     |              |         |              |                 |                    |                  |              |
| 3. Log Byram Intensity | Pearson's r | 0.008    | -0.154  | —                   |              |         |              |                 |                    |                  |              |
|                        | p-value     | 0.966    | 0.409   | —                   |              |         |              |                 |                    |                  |              |
| 4. 2.2- Grass %        | Pearson's r | -0.128   | -0.110  | 0.018               | —            |         |              |                 |                    |                  |              |
|                        | p-value     | 0.493    | 0.555   | 0.922               | —            |         |              |                 |                    |                  |              |
| 5. True CC             | Pearson's r | -0.201   | -0.290  | 0.677***            | 0.052        | —       |              |                 |                    |                  |              |
|                        | p-value     | 0.279    | 0.114   | < .001              | 0.779        | —       |              |                 |                    |                  |              |
| 6. Log Humidity        | Pearson's r | 0.398*   | 0.519** | -0.024              | 0.051        | 0.121   | —            |                 |                    |                  |              |
|                        | p-value     | 0.026    | 0.003   | 0.897               | 0.786        | 0.516   | —            |                 |                    |                  |              |
| 7. Eff_Visual (BE)     | Pearson's r | 0.263    | 0.202   | 0.077               | -0.130       | 0.246   | 0.117        | —               |                    |                  |              |
|                        | p-value     | 0.153    | 0.276   | 0.680               | 0.485        | 0.182   | 0.531        | —               |                    |                  |              |
| 8. Log total moisture  | Pearson's r | 0.172    | 0.246   | -0.430*             | 0.322        | -0.280  | 0.432*       | -0.057          | —                  |                  |              |
|                        | p-value     | 0.354    | 0.183   | 0.016               | 0.078        | 0.127   | 0.015        | 0.761           | —                  |                  |              |
| 9. Wind_speed (m/s)    | Pearson's r | 0.289    | 0.010   | -0.008              | 0.207        | 0.100   | -0.008       | 0.207           | 0.002              | —                |              |
|                        | p-value     | 0.115    | 0.956   | 0.968               | 0.265        | 0.591   | 0.964        | 0.264           | 0.991              | —                |              |
| 10. ambient_temp       | Pearson's r | -0.229   | -0.177  | -0.161              | -0.371*      | -0.283  | -0.595***    | 0.186           | -0.199             | -0.034           | —            |
|                        | p-value     | 0.215    | 0.339   | 0.386               | 0.040        | 0.123   | < .001       | 0.316           | 0.282              | 0.856            | —            |

\* p < .05, \*\* p < .01, \*\*\* p < .001

**Table S6.** Methane EF Correlations for Key Variables for Late Fires.

LDS EF CH4 and Byram\_act\_dry; grass\_biomass\_%, m/s, Total Moisture, Wind\_Speed (m/s), ambient\_temp, humidity, everything that went into the regression with Y as EF CH4. No transformed variables.

## Pearson's Correlations

| Variable               |             | EF CH4   | MCE      | Log Byram Intensity | 2.2- Grass % | True CC | Log Humidity | Eff_Visual (BE) | Log total moisture | Wind_speed (m/s) | ambient_temp |
|------------------------|-------------|----------|----------|---------------------|--------------|---------|--------------|-----------------|--------------------|------------------|--------------|
| 1. EF CH4              | Pearson's r | —        |          |                     |              |         |              |                 |                    |                  |              |
|                        | p-value     | —        |          |                     |              |         |              |                 |                    |                  |              |
| 2. MCE                 | Pearson's r | 0.231    | —        |                     |              |         |              |                 |                    |                  |              |
|                        | p-value     | 0.203    | —        |                     |              |         |              |                 |                    |                  |              |
| 3. Log Byram Intensity | Pearson's r | -0.190   | 0.044    | —                   |              |         |              |                 |                    |                  |              |
|                        | p-value     | 0.299    | 0.810    | —                   |              |         |              |                 |                    |                  |              |
| 4. 2.2- Grass %        | Pearson's r | 0.081    | 0.644*** | 0.156               | —            |         |              |                 |                    |                  |              |
|                        | p-value     | 0.661    | < .001   | 0.395               | —            |         |              |                 |                    |                  |              |
| 5. True CC             | Pearson's r | -0.202   | -0.435*  | 0.144               | -0.150       | —       |              |                 |                    |                  |              |
|                        | p-value     | 0.267    | 0.013    | 0.432               | 0.414        | —       |              |                 |                    |                  |              |
| 6. Log Humidity        | Pearson's r | -0.058   | 0.054    | -0.193              | -0.071       | 0.279   | —            |                 |                    |                  |              |
|                        | p-value     | 0.752    | 0.768    | 0.289               | 0.701        | 0.122   | —            |                 |                    |                  |              |
| 7. Eff_Visual (BE)     | Pearson's r | -0.549** | -0.078   | 0.114               | -0.154       | 0.234   | 0.247        | —               |                    |                  |              |
|                        | p-value     | 0.001    | 0.672    | 0.533               | 0.399        | 0.197   | 0.174        | —               |                    |                  |              |
| 8. Log total moisture  | Pearson's r | -0.143   | -0.191   | -0.162              | -0.344       | 0.325   | 0.759***     | 0.306           | —                  |                  |              |
|                        | p-value     | 0.436    | 0.294    | 0.377               | 0.054        | 0.069   | < .001       | 0.088           | —                  |                  |              |
| 9. Wind_speed (m/s)    | Pearson's r | 0.160    | 0.043    | 0.210               | -0.159       | -0.082  | 0.718**      | -0.131          | 0.680**            | —                |              |
|                        | p-value     | 0.568    | 0.879    | 0.454               | 0.570        | 0.771   | 0.003        | 0.642           | 0.005              | —                |              |
| 10. ambient_temp       | Pearson's r | 0.087    | 0.342    | 0.013               | 0.429*       | -0.121  | 0.083        | -0.139          | -0.579***          | -0.549*          | —            |
|                        | p-value     | 0.637    | 0.055    | 0.942               | 0.014        | 0.511   | 0.652        | 0.447           | < .001             | 0.034            | —            |

\* p < .05, \*\* p < .01, \*\*\* p < .001

**Table S7. Methane ED Correlations for Key Variables for All Fires.**

All fire Transformed: ED CH4 and Byram\_act\_dry; grass\_biomass\_%, m/s, Total Moisture, Wind\_Speed (m/s), ambient\_temp, humidity, everything that went into the regression with Y as ED CH4. No transformed variables.

## Pearson's Correlations

| Variable                     |                        | Emission CH4 Density g/m2 | MCE                | Log Byram Intensity | 2.2- Grass %    | True CC             | Log Humidity        | Eff_Visual (BE)  | Log total moisture  | Wind_speed (m/s)    | ambient_temp |
|------------------------------|------------------------|---------------------------|--------------------|---------------------|-----------------|---------------------|---------------------|------------------|---------------------|---------------------|--------------|
| 1. Emission CH4 Density g/m2 | Pearson's r<br>p-value | —<br>—                    |                    |                     |                 |                     |                     |                  |                     |                     |              |
| 2. MCE                       | Pearson's r<br>p-value | 0.297**<br>0.005          | —<br>—             |                     |                 |                     |                     |                  |                     |                     |              |
| 3. Log Byram Intensity       | Pearson's r<br>p-value | 0.134<br>0.219            | -0.226*<br>0.036   | —<br>—              |                 |                     |                     |                  |                     |                     |              |
| 4. 2.2- Grass %              | Pearson's r<br>p-value | 0.097<br>0.374            | 0.167<br>0.124     | 0.048<br>0.658      | —<br>—          |                     |                     |                  |                     |                     |              |
| 5. True CC                   | Pearson's r<br>p-value | 0.109<br>0.317            | -0.260*<br>0.016   | 0.606***<br>< .001  | 0.081<br>0.461  | —<br>—              |                     |                  |                     |                     |              |
| 6. Log Humidity              | Pearson's r<br>p-value | 0.024<br>0.826            | 0.506***<br>< .001 | -0.219*<br>0.042    | -0.164<br>0.132 | -0.044<br>0.690     | —<br>—              |                  |                     |                     |              |
| 7. Eff_Visual (BE)           | Pearson's r<br>p-value | 0.072<br>0.511            | -0.280**<br>0.009  | 0.216*<br>0.046     | -0.029<br>0.790 | 0.256*<br>0.017     | -0.257*<br>0.017    | —<br>—           |                     |                     |              |
| 8. Log total moisture        | Pearson's r<br>p-value | -0.026<br>0.809           | 0.235*<br>0.029    | -0.415***<br>< .001 | 0.047<br>0.665  | -0.383***<br>< .001 | 0.486***<br>< .001  | -0.132<br>0.227  | —<br>—              |                     |              |
| 9. Wind_speed (m/s)          | Pearson's r<br>p-value | 0.367**<br>0.002          | 0.202<br>0.096     | -0.021<br>0.864     | 0.081<br>0.509  | 0.038<br>0.756      | 0.082<br>0.504      | -0.059<br>0.629  | 0.161<br>0.188      | —<br>—              |              |
| 10. ambient_temp             | Pearson's r<br>p-value | -0.135<br>0.217           | -0.219*<br>0.043   | 0.111<br>0.310      | 0.076<br>0.488  | 0.005<br>0.964      | -0.505***<br>< .001 | 0.280**<br>0.009 | -0.454***<br>< .001 | -0.428***<br>< .001 | —<br>—       |

\* p < .05, \*\* p < .01, \*\*\* p < .001

**Table S8. Methane ED Correlations for Key Variables for Head Fires.**

Headfire Transformed: ED CH4 and Byram\_act\_dry; grass\_biomass\_%, m/s, Total Moisture, Wind\_Speed (m/s), ambient\_temp, humidity, everything that went into the regression with Y as ED CH4. No transformed variables.

## Pearson's Correlations

| Variable                     |                        | Emission CH4 Density g/m2 | MCE              | Log Byram Intensity | 2.2- Grass %    | True CC         | Log Humidity     | Eff_Visual (BE) | Log total moisture | Wind_speed (m/s) | ambient_temp |
|------------------------------|------------------------|---------------------------|------------------|---------------------|-----------------|-----------------|------------------|-----------------|--------------------|------------------|--------------|
| 1. Emission CH4 Density g/m2 | Pearson's r<br>p-value | —<br>—                    |                  |                     |                 |                 |                  |                 |                    |                  |              |
| 2. MCE                       | Pearson's r<br>p-value | 0.371*<br>0.028           | —<br>—           |                     |                 |                 |                  |                 |                    |                  |              |
| 3. Log Byram Intensity       | Pearson's r<br>p-value | 0.070<br>0.691            | -0.142<br>0.416  | —<br>—              |                 |                 |                  |                 |                    |                  |              |
| 4. 2.2- Grass %              | Pearson's r<br>p-value | 0.048<br>0.786            | 0.214<br>0.218   | -0.028<br>0.874     | —<br>—          |                 |                  |                 |                    |                  |              |
| 5. True CC                   | Pearson's r<br>p-value | -0.152<br>0.384           | -0.179<br>0.304  | 0.461**<br>0.005    | 0.081<br>0.643  | —<br>—          |                  |                 |                    |                  |              |
| 6. Log Humidity              | Pearson's r<br>p-value | -0.061<br>0.727           | 0.434**<br>0.009 | -0.194<br>0.265     | -0.081<br>0.643 | 0.160<br>0.358  | —<br>—           |                 |                    |                  |              |
| 7. Eff_Visual (BE)           | Pearson's r<br>p-value | 0.116<br>0.507            | -0.300<br>0.080  | 0.026<br>0.884      | -0.030<br>0.864 | 0.338*<br>0.047 | -0.252<br>0.144  | —<br>—          |                    |                  |              |
| 8. Log total moisture        | Pearson's r<br>p-value | -0.046<br>0.793           | 0.070<br>0.689   | -0.496**<br>0.002   | 0.120<br>0.491  | -0.318<br>0.062 | 0.506**<br>0.002 | -0.133<br>0.447 | —<br>—             |                  |              |
| 9. Wind_speed (m/s)          | Pearson's r<br>p-value | 0.372*<br>0.047           | 0.364<br>0.052   | -0.172<br>0.371     | 0.225<br>0.240  | -0.156<br>0.420 | 0.042<br>0.827   | 0.007<br>0.970  | 0.361<br>0.054     | —<br>—           |              |
| 10. ambient_temp             | Pearson's r<br>p-value | -0.340*<br>0.046          | -0.247<br>0.152  | 0.044<br>0.800      | 0.138<br>0.428  | 0.114<br>0.515  | -0.412*<br>0.014 | 0.260<br>0.132  | -0.509**<br>0.002  | -0.373*<br>0.046 | —<br>—       |

\* p < .05, \*\* p < .01, \*\*\* p < .001

**Table S9.** Methane ED Correlations for Key Variables for Backfires.

Backfire Transformed: ED CH4 and Byram\_act\_dry; grass\_biomass\_%, m/s, Total Moisture, Wind\_Speed (m/s), ambient\_temp, humidity, everything that went into the regression with Y as ED CH4. No transformed variables.

| Pearson's Correlations       |                        | Emission CH4 Density g/m2 | MCE                | Log Byram Intensity | 2.2- Grass %    | True CC           | Log Humidity        | Eff_Visual (BE) | Log total moisture | Wind_speed (m/s)  | ambient_temp |
|------------------------------|------------------------|---------------------------|--------------------|---------------------|-----------------|-------------------|---------------------|-----------------|--------------------|-------------------|--------------|
| 1. Emission CH4 Density g/m2 | Pearson's r<br>p-value | —<br>—                    |                    |                     |                 |                   |                     |                 |                    |                   |              |
| 2. MCE                       | Pearson's r<br>p-value | 0.267<br>0.058            | —<br>—             |                     |                 |                   |                     |                 |                    |                   |              |
| 3. Log Byram Intensity       | Pearson's r<br>p-value | 0.250<br>0.076            | -0.363**<br>0.009  | —<br>—              |                 |                   |                     |                 |                    |                   |              |
| 4. 2.2- Grass %              | Pearson's r<br>p-value | 0.145<br>0.311            | 0.125<br>0.384     | 0.049<br>0.733      | —<br>—          |                   |                     |                 |                    |                   |              |
| 5. True CC                   | Pearson's r<br>p-value | 0.223<br>0.116            | -0.304*<br>0.030   | 0.746***<br>< .001  | 0.084<br>0.557  | —<br>—            |                     |                 |                    |                   |              |
| 6. Log Humidity              | Pearson's r<br>p-value | 0.087<br>0.545            | 0.562***<br>< .001 | -0.286*<br>0.042    | -0.236<br>0.096 | -0.152<br>0.287   | —<br>—              |                 |                    |                   |              |
| 7. Eff_Visual (BE)           | Pearson's r<br>p-value | 0.053<br>0.709            | -0.276*<br>0.050   | 0.320*<br>0.022     | -0.036<br>0.804 | 0.224<br>0.114    | -0.264<br>0.061     | —<br>—          |                    |                   |              |
| 8. Log total moisture        | Pearson's r<br>p-value | 0.001<br>0.994            | 0.355*<br>0.010    | -0.501***<br>< .001 | -0.027<br>0.852 | -0.437**<br>0.001 | 0.469***<br>< .001  | -0.141<br>0.324 | —<br>—             |                   |              |
| 9. Wind_speed (m/s)          | Pearson's r<br>p-value | 0.350*<br>0.027           | 0.119<br>0.466     | 0.124<br>0.446      | -0.006<br>0.972 | 0.133<br>0.412    | 0.120<br>0.462      | -0.097<br>0.553 | 0.019<br>0.907     | —<br>—            |              |
| 10. ambient_temp             | Pearson's r<br>p-value | 0.012<br>0.933            | -0.202<br>0.154    | 0.152<br>0.285      | 0.020<br>0.889  | -0.052<br>0.715   | -0.587***<br>< .001 | 0.295*<br>0.036 | -0.413**<br>0.003  | -0.472**<br>0.002 | —<br>—       |

\* p < .05, \*\* p < .01, \*\*\* p < .001

**Table S10.** Methane ED Correlations for Key Variables for Early Fires.

EDS fire Transformed: ED CH4 and Byram\_act\_dry; grass\_biomass\_%, m/s, Total Moisture, Wind\_Speed (m/s), ambient\_temp, humidity, everything that went into the regression with Y as ED CH4. No transformed variables.

| Pearson's Correlations       |                        | Emission CH4 Density g/m2 | MCE               | Log Byram Intensity | 2.2- Grass %    | True CC           | Log Humidity        | Eff_Visual (BE) | Log total moisture | Wind_speed (m/s) | ambient_temp |
|------------------------------|------------------------|---------------------------|-------------------|---------------------|-----------------|-------------------|---------------------|-----------------|--------------------|------------------|--------------|
| 1. Emission CH4 Density g/m2 | Pearson's r<br>p-value | —<br>—                    |                   |                     |                 |                   |                     |                 |                    |                  |              |
| 2. MCE                       | Pearson's r<br>p-value | 0.158<br>0.470            | —<br>—            |                     |                 |                   |                     |                 |                    |                  |              |
| 3. Log Byram Intensity       | Pearson's r<br>p-value | 0.168<br>0.445            | -0.120<br>0.585   | —<br>—              |                 |                   |                     |                 |                    |                  |              |
| 4. 2.2- Grass %              | Pearson's r<br>p-value | -0.039<br>0.861           | 0.539**<br>0.008  | -0.123<br>0.576     | —<br>—          |                   |                     |                 |                    |                  |              |
| 5. True CC                   | Pearson's r<br>p-value | 0.394<br>0.063            | 0.112<br>0.611    | 0.648***<br>< .001  | 0.249<br>0.251  | —<br>—            |                     |                 |                    |                  |              |
| 6. Log Humidity              | Pearson's r<br>p-value | -0.112<br>0.611           | -0.109<br>0.621   | -0.104<br>0.638     | -0.220<br>0.313 | -0.181<br>0.408   | —<br>—              |                 |                    |                  |              |
| 7. Eff_Visual (BE)           | Pearson's r<br>p-value | 0.199<br>0.363            | -0.266<br>0.221   | 0.208<br>0.340      | -0.371<br>0.081 | 0.135<br>0.540    | -0.229<br>0.294     | —<br>—          |                    |                  |              |
| 8. Log total moisture        | Pearson's r<br>p-value | -0.265<br>0.221           | -0.602**<br>0.002 | -0.183<br>0.404     | -0.311<br>0.149 | -0.570**<br>0.005 | 0.377<br>0.077      | 0.202<br>0.355  | —<br>—             |                  |              |
| 9. Wind_speed (m/s)          | Pearson's r<br>p-value | 0.198<br>0.365            | 0.268<br>0.216    | 0.204<br>0.351      | -0.184<br>0.400 | 0.238<br>0.273    | 0.424*<br>0.044     | -0.341<br>0.112 | -0.177<br>0.420    | —<br>—           |              |
| 10. ambient_temp             | Pearson's r<br>p-value | 0.086<br>0.695            | 0.131<br>0.551    | 0.039<br>0.861      | 0.383<br>0.071  | 0.203<br>0.352    | -0.879***<br>< .001 | 0.230<br>0.291  | -0.312<br>0.147    | -0.504*<br>0.014 | —<br>—       |

\* p < .05, \*\* p < .01, \*\*\* p < .001

**Table S11.** Methane ED Correlations for Key Variables for Middle Fires.

MDS fire Transformed: ED CH4 and Byram\_act\_dry; grass\_biomass\_%, m/s, Total Moisture, Wind\_Speed (m/s), ambient\_temp, humidity, everything that went into the regression with Y as ED CH4. No transformed variables.

## Pearson's Correlations

| Variable                     |             | Emission CH4 Density g/m2 | MCE     | Log Byram Intensity | 2.2- Grass % | True CC | Log Humidity | Eff_Visual (BE) | Log total moisture | Wind_speed (m/s) | ambient_temp |
|------------------------------|-------------|---------------------------|---------|---------------------|--------------|---------|--------------|-----------------|--------------------|------------------|--------------|
| 1. Emission CH4 Density g/m2 | Pearson's r | —                         |         |                     |              |         |              |                 |                    |                  |              |
|                              | p-value     | —                         |         |                     |              |         |              |                 |                    |                  |              |
| 2. MCE                       | Pearson's r | 0.368*                    | —       |                     |              |         |              |                 |                    |                  |              |
|                              | p-value     | 0.042                     | —       |                     |              |         |              |                 |                    |                  |              |
| 3. Log Byram Intensity       | Pearson's r | 0.391*                    | -0.154  | —                   |              |         |              |                 |                    |                  |              |
|                              | p-value     | 0.030                     | 0.409   | —                   |              |         |              |                 |                    |                  |              |
| 4. 2.2- Grass %              | Pearson's r | -0.080                    | -0.110  | 0.018               | —            |         |              |                 |                    |                  |              |
|                              | p-value     | 0.670                     | 0.555   | 0.922               | —            |         |              |                 |                    |                  |              |
| 5. True CC                   | Pearson's r | 0.182                     | -0.290  | 0.677***            | 0.052        | —       |              |                 |                    |                  |              |
|                              | p-value     | 0.327                     | 0.114   | < .001              | 0.779        | —       |              |                 |                    |                  |              |
| 6. Log Humidity              | Pearson's r | 0.068                     | 0.519** | -0.024              | 0.051        | 0.121   | —            |                 |                    |                  |              |
|                              | p-value     | 0.716                     | 0.003   | 0.897               | 0.786        | 0.516   | —            |                 |                    |                  |              |
| 7. Eff_Visual (BE)           | Pearson's r | 0.227                     | 0.202   | 0.077               | -0.130       | 0.246   | 0.117        | —               |                    |                  |              |
|                              | p-value     | 0.219                     | 0.276   | 0.680               | 0.485        | 0.182   | 0.531        | —               |                    |                  |              |
| 8. Log total moisture        | Pearson's r | -0.184                    | 0.246   | -0.430*             | 0.322        | -0.280  | 0.432*       | -0.057          | —                  |                  |              |
|                              | p-value     | 0.321                     | 0.183   | 0.016               | 0.078        | 0.127   | 0.015        | 0.761           | —                  |                  |              |
| 9. Wind_speed (m/s)          | Pearson's r | 0.360*                    | 0.010   | -0.008              | 0.207        | 0.100   | -0.008       | 0.207           | 0.002              | —                |              |
|                              | p-value     | 0.047                     | 0.956   | 0.968               | 0.265        | 0.591   | 0.964        | 0.264           | 0.991              | —                |              |
| 10. ambient_temp             | Pearson's r | -0.216                    | -0.177  | -0.161              | -0.371*      | -0.283  | -0.595***    | 0.186           | -0.199             | -0.034           | —            |
|                              | p-value     | 0.243                     | 0.339   | 0.386               | 0.040        | 0.123   | < .001       | 0.316           | 0.282              | 0.856            | —            |

\* p < .05, \*\* p < .01, \*\*\* p < .001

**Table S12.** Methane EF Correlations for Key Variables for Late Fires.

LDS fire Transformed: ED CH4 and Byram\_act\_dry; grass\_biomass\_%, m/s, Total Moisture, Wind\_Speed (m/s), ambient\_temp, humidity, everything that went into the regression with Y as ED CH4. No transformed variables.

## Pearson's Correlations

| Variable                     |             | Emission CH4 Density g/m2 | MCE      | Log Byram Intensity | 2.2- Grass % | True CC | Log Humidity | Eff_Visual (BE) | Log total moisture | Wind_speed (m/s) | ambient_temp |
|------------------------------|-------------|---------------------------|----------|---------------------|--------------|---------|--------------|-----------------|--------------------|------------------|--------------|
| 1. Emission CH4 Density g/m2 | Pearson's r | —                         |          |                     |              |         |              |                 |                    |                  |              |
|                              | p-value     | —                         |          |                     |              |         |              |                 |                    |                  |              |
| 2. MCE                       | Pearson's r | 0.367*                    | —        |                     |              |         |              |                 |                    |                  |              |
|                              | p-value     | 0.039                     | —        |                     |              |         |              |                 |                    |                  |              |
| 3. Log Byram Intensity       | Pearson's r | -0.048                    | 0.044    | —                   |              |         |              |                 |                    |                  |              |
|                              | p-value     | 0.796                     | 0.810    | —                   |              |         |              |                 |                    |                  |              |
| 4. 2.2- Grass %              | Pearson's r | 0.209                     | 0.644*** | 0.156               | —            |         |              |                 |                    |                  |              |
|                              | p-value     | 0.251                     | < .001   | 0.395               | —            |         |              |                 |                    |                  |              |
| 5. True CC                   | Pearson's r | -0.186                    | -0.435*  | 0.144               | -0.150       | —       |              |                 |                    |                  |              |
|                              | p-value     | 0.308                     | 0.013    | 0.432               | 0.414        | —       |              |                 |                    |                  |              |
| 6. Log Humidity              | Pearson's r | -0.035                    | 0.054    | -0.193              | -0.071       | 0.279   | —            |                 |                    |                  |              |
|                              | p-value     | 0.851                     | 0.768    | 0.289               | 0.701        | 0.122   | —            |                 |                    |                  |              |
| 7. Eff_Visual (BE)           | Pearson's r | -0.545**                  | -0.078   | 0.114               | -0.154       | 0.234   | 0.247        | —               |                    |                  |              |
|                              | p-value     | 0.001                     | 0.672    | 0.533               | 0.399        | 0.197   | 0.174        | —               |                    |                  |              |
| 8. Log total moisture        | Pearson's r | -0.116                    | -0.191   | -0.162              | -0.344       | 0.325   | 0.759***     | 0.306           | —                  |                  |              |
|                              | p-value     | 0.528                     | 0.294    | 0.377               | 0.054        | 0.069   | < .001       | 0.088           | —                  |                  |              |
| 9. Wind_speed (m/s)          | Pearson's r | 0.215                     | 0.043    | 0.210               | -0.159       | -0.082  | 0.718**      | -0.131          | 0.680**            | —                |              |
|                              | p-value     | 0.442                     | 0.879    | 0.454               | 0.570        | 0.771   | 0.003        | 0.642           | 0.005              | —                |              |
| 10. ambient_temp             | Pearson's r | 0.090                     | 0.342    | 0.013               | 0.429*       | -0.121  | 0.083        | -0.139          | -0.579***          | -0.549*          | —            |
|                              | p-value     | 0.622                     | 0.055    | 0.942               | 0.014        | 0.511   | 0.652        | 0.447           | < .001             | 0.034            | —            |

\* p < .05, \*\* p < .01, \*\*\* p < .001

### Supplementary 3. Methane and Carbon Monoxide EF Correlations

**Table S13.** Methane and Carbon Monoxide EF correlation with Ambient Weather Conditions for all fires.

| Pearson's Correlations |                        | Variable            | EF CH4              | EF CO               | Wind_speed (m/s)    | ambient_temp | Log Humidity |
|------------------------|------------------------|---------------------|---------------------|---------------------|---------------------|--------------|--------------|
| 1. EF CH4              | Pearson's r<br>p-value | —<br>—              |                     |                     |                     |              |              |
| 2. EF CO               | Pearson's r<br>p-value | -0.525***<br>< .001 | —<br>—              |                     |                     |              |              |
| 3. Wind_speed (m/s)    | Pearson's r<br>p-value | 0.391***<br>< .001  | -0.205<br>0.091     | —<br>—              |                     |              |              |
| 4. ambient_temp        | Pearson's r<br>p-value | -0.244*<br>0.023    | 0.197<br>0.068      | -0.428***<br>< .001 | —<br>—              |              |              |
| 5. Log Humidity        | Pearson's r<br>p-value | 0.242*<br>0.025     | -0.489***<br>< .001 | 0.082<br>0.504      | -0.505***<br>< .001 | —<br>—       |              |

\* p < .05, \*\* p < .01, \*\*\* p < .001

### Supplementary 4. Methane EF and ED Correlations for Local and Random Fires

Tables S1–S16. Methane EF and ED Correlations for Key Variables by Local and Random Fire

**Table S14.** Methane EF Correlations for Key Variables for Local Fires.

Local EF CH4 and Byram\_act\_dry; grass\_biomass\_%, m/s, Total Moisture, Wind\_Speed (m/s), ambient\_temp, humidity, everything that went into the regression with Y as EF CH4. No transformed variables.

| Pearson's Correlations |                        | Variable        | EF CH4          | MCE             | Log Byram Intensity | 2.2- Grass %    | True CC           | Log Humidity    | Eff_Visual (BE) | Log total moisture | Wind_speed (m/s) | ambient_temp |
|------------------------|------------------------|-----------------|-----------------|-----------------|---------------------|-----------------|-------------------|-----------------|-----------------|--------------------|------------------|--------------|
| 1. EF CH4              | Pearson's r<br>p-value | —<br>—          |                 |                 |                     |                 |                   |                 |                 |                    |                  |              |
| 2. MCE                 | Pearson's r<br>p-value | 0.655*<br>0.021 | —<br>—          |                 |                     |                 |                   |                 |                 |                    |                  |              |
| 3. Log Byram Intensity | Pearson's r<br>p-value | 0.534<br>0.073  | 0.214<br>0.504  | —<br>—          |                     |                 |                   |                 |                 |                    |                  |              |
| 4. 2.2- Grass %        | Pearson's r<br>p-value | -0.396<br>0.202 | -0.098<br>0.762 | -0.486<br>0.109 | —<br>—              |                 |                   |                 |                 |                    |                  |              |
| 5. True CC             | Pearson's r<br>p-value | -0.055<br>0.865 | -0.325<br>0.302 | 0.379<br>0.224  | -0.029<br>0.929     | —<br>—          |                   |                 |                 |                    |                  |              |
| 6. Log Humidity        | Pearson's r<br>p-value | 0.105<br>0.745  | 0.300<br>0.343  | -0.042<br>0.896 | 0.004<br>0.989      | 0.528<br>0.078  | —<br>—            |                 |                 |                    |                  |              |
| 7. Eff_Visual (BE)     | Pearson's r<br>p-value | 0.319<br>0.313  | 0.108<br>0.739  | -0.022<br>0.946 | -0.101<br>0.755     | 0.199<br>0.534  | 0.081<br>0.802    | —<br>—          |                 |                    |                  |              |
| 8. Log total moisture  | Pearson's r<br>p-value | -0.462<br>0.131 | -0.159<br>0.621 | -0.450<br>0.142 | 0.401<br>0.196      | 0.080<br>0.805  | 0.330<br>0.294    | 0.004<br>0.991  | —<br>—          |                    |                  |              |
| 9. Wind_speed (m/s)    | Pearson's r<br>p-value | 0.229<br>0.475  | -0.201<br>0.532 | 0.153<br>0.635  | -0.146<br>0.651     | 0.129<br>0.690  | -0.154<br>0.633   | 0.226<br>0.480  | -0.490<br>0.105 | —<br>—             |                  |              |
| 10. ambient_temp       | Pearson's r<br>p-value | -0.281<br>0.377 | -0.466<br>0.127 | -0.117<br>0.717 | 0.082<br>0.800      | -0.462<br>0.130 | -0.775**<br>0.003 | -0.063<br>0.846 | 0.105<br>0.744  | -0.006<br>0.986    | —<br>—           |              |

\* p < .05, \*\* p < .01, \*\*\* p < .001



**Table S15.** Methane EF Correlations for Key Variables for Random Fires.

Random EF CH4 and Byram\_act\_dry; grass\_biomass\_%, m/s, Total Moisture, Wind\_Speed (m/s), ambient\_temp, humidity, everything that went into the regression with Y as EF CH4. No transformed variables.

## Pearson's Correlations

| Variable               |             | EF CH4   | MCE      | Log Byram Intensity | 2.2- Grass % | True CC | Log Humidity | Eff_Visual (BE) | Log total moisture | Wind_speed (m/s) | ambient_temp |
|------------------------|-------------|----------|----------|---------------------|--------------|---------|--------------|-----------------|--------------------|------------------|--------------|
| 1. EF CH4              | Pearson's r | —        |          |                     |              |         |              |                 |                    |                  |              |
|                        | p-value     | —        |          |                     |              |         |              |                 |                    |                  |              |
| 2. MCE                 | Pearson's r | 0.736*** | —        |                     |              |         |              |                 |                    |                  |              |
|                        | p-value     | < .001   | —        |                     |              |         |              |                 |                    |                  |              |
| 3. Log Byram Intensity | Pearson's r | -0.205   | -0.365   | —                   |              |         |              |                 |                    |                  |              |
|                        | p-value     | 0.399    | 0.124    | —                   |              |         |              |                 |                    |                  |              |
| 4. 2.2- Grass %        | Pearson's r | 0.018    | -0.124   | 0.222               | —            |         |              |                 |                    |                  |              |
|                        | p-value     | 0.940    | 0.612    | 0.362               | —            |         |              |                 |                    |                  |              |
| 5. True CC             | Pearson's r | -0.261   | -0.325   | 0.738***            | 0.038        | —       |              |                 |                    |                  |              |
|                        | p-value     | 0.281    | 0.175    | < .001              | 0.878        | —       |              |                 |                    |                  |              |
| 6. Log Humidity        | Pearson's r | 0.709*** | 0.835*** | -0.017              | -0.111       | -0.044  | —            |                 |                    |                  |              |
|                        | p-value     | < .001   | < .001   | 0.946               | 0.652        | 0.859   | —            |                 |                    |                  |              |
| 7. Eff_Visual (BE)     | Pearson's r | 0.224    | 0.294    | 0.127               | -0.107       | 0.301   | 0.203        | —               |                    |                  |              |
|                        | p-value     | 0.357    | 0.222    | 0.603               | 0.663        | 0.210   | 0.404        | —               |                    |                  |              |
| 8. Log total moisture  | Pearson's r | 0.564*   | 0.601**  | -0.453              | 0.137        | -0.432  | 0.475*       | -0.064          | —                  |                  |              |
|                        | p-value     | 0.012    | 0.006    | 0.052               | 0.575        | 0.064   | 0.040        | 0.796           | —                  |                  |              |
| 9. Wind_speed (m/s)    | Pearson's r | 0.357    | 0.243    | -0.084              | 0.283        | 0.079   | 0.017        | 0.252           | 0.215              | —                |              |
|                        | p-value     | 0.133    | 0.317    | 0.733               | 0.241        | 0.747   | 0.944        | 0.299           | 0.377              | —                |              |
| 10. ambient_temp       | Pearson's r | -0.242   | -0.007   | -0.214              | -0.384       | -0.250  | -0.407       | 0.334           | -0.200             | 0.194            | —            |
|                        | p-value     | 0.319    | 0.977    | 0.379               | 0.105        | 0.301   | 0.084        | 0.163           | 0.411              | 0.426            | —            |

\* p < .05, \*\* p < .01, \*\*\* p < .001

**Table S16.** Methane ED Correlations for Key Variables for Local Fires.

Local fire Transformed: ED CH4 and Byram\_act\_dry; grass\_biomass\_%, m/s, Total Moisture, Wind\_Speed (m/s), ambient\_temp, humidity, everything that went into the regression with Y as ED CH4. No transformed variables.

## Pearson's Correlations

| Variable                     |             | Emission CH4 Density g/m2 | MCE    | Log Byram Intensity | 2.2- Grass % | True CC | Log Humidity | Eff_Visual (BE) | Log total moisture | Wind_speed (m/s) | ambient_temp |
|------------------------------|-------------|---------------------------|--------|---------------------|--------------|---------|--------------|-----------------|--------------------|------------------|--------------|
| 1. Emission CH4 Density g/m2 | Pearson's r | —                         |        |                     |              |         |              |                 |                    |                  |              |
|                              | p-value     | —                         |        |                     |              |         |              |                 |                    |                  |              |
| 2. MCE                       | Pearson's r | 0.472                     | —      |                     |              |         |              |                 |                    |                  |              |
|                              | p-value     | 0.121                     | —      |                     |              |         |              |                 |                    |                  |              |
| 3. Log Byram Intensity       | Pearson's r | 0.576                     | 0.214  | —                   |              |         |              |                 |                    |                  |              |
|                              | p-value     | 0.050                     | 0.504  | —                   |              |         |              |                 |                    |                  |              |
| 4. 2.2- Grass %              | Pearson's r | -0.512                    | -0.098 | -0.486              | —            |         |              |                 |                    |                  |              |
|                              | p-value     | 0.089                     | 0.762  | 0.109               | —            |         |              |                 |                    |                  |              |
| 5. True CC                   | Pearson's r | -0.248                    | -0.325 | 0.379               | -0.029       | —       |              |                 |                    |                  |              |
|                              | p-value     | 0.436                     | 0.302  | 0.224               | 0.929        | —       |              |                 |                    |                  |              |
| 6. Log Humidity              | Pearson's r | -0.246                    | 0.300  | -0.042              | 0.004        | 0.528   | —            |                 |                    |                  |              |
|                              | p-value     | 0.441                     | 0.343  | 0.896               | 0.989        | 0.078   | —            |                 |                    |                  |              |
| 7. Eff_Visual (BE)           | Pearson's r | 0.250                     | 0.108  | -0.022              | -0.101       | 0.199   | 0.081        | —               |                    |                  |              |
|                              | p-value     | 0.434                     | 0.739  | 0.946               | 0.755        | 0.534   | 0.802        | —               |                    |                  |              |
| 8. Log total moisture        | Pearson's r | -0.689*                   | -0.159 | -0.450              | 0.401        | 0.080   | 0.330        | 0.004           | —                  |                  |              |
|                              | p-value     | 0.013                     | 0.621  | 0.142               | 0.196        | 0.805   | 0.294        | 0.991           | —                  |                  |              |
| 9. Wind_speed (m/s)          | Pearson's r | 0.345                     | -0.201 | 0.153               | -0.146       | 0.129   | -0.154       | 0.226           | -0.490             | —                |              |
|                              | p-value     | 0.271                     | 0.532  | 0.635               | 0.651        | 0.690   | 0.633        | 0.480           | 0.105              | —                |              |
| 10. ambient_temp             | Pearson's r | 0.086                     | -0.466 | -0.117              | 0.082        | -0.462  | -0.775**     | -0.063          | 0.105              | -0.006           | —            |
|                              | p-value     | 0.791                     | 0.127  | 0.717               | 0.800        | 0.130   | 0.003        | 0.846           | 0.744              | 0.986            | —            |

\* p < .05, \*\* p < .01, \*\*\* p < .001

**Table S17.** Methane ED Correlations for Key Variables for Random Fires.

Random fire Transformed: ED CH4 and Byram\_act\_dry; grass\_biomass\_%, m/s, Total Moisture, Wind\_Speed (m/s), ambient\_temp, humidity, everything that went into the regression with Y as ED CH4. No transformed variables.

## Pearson's Correlations

| Variable                     |             | Emission CH4 Density g/m2 | MCE      | Log Byram Intensity | 2.2- Grass % | True CC | Log Humidity | Eff_Visual (BE) | Log total moisture | Wind_speed (m/s) | ambient_temp |
|------------------------------|-------------|---------------------------|----------|---------------------|--------------|---------|--------------|-----------------|--------------------|------------------|--------------|
| 1. Emission CH4 Density g/m2 | Pearson's r | —                         |          |                     |              |         |              |                 |                    |                  |              |
|                              | p-value     | —                         |          |                     |              |         |              |                 |                    |                  |              |
| 2. MCE                       | Pearson's r | 0.258                     | —        |                     |              |         |              |                 |                    |                  |              |
|                              | p-value     | 0.287                     | —        |                     |              |         |              |                 |                    |                  |              |
| 3. Log Byram Intensity       | Pearson's r | 0.339                     | -0.365   | —                   |              |         |              |                 |                    |                  |              |
|                              | p-value     | 0.156                     | 0.124    | —                   |              |         |              |                 |                    |                  |              |
| 4. 2.2- Grass %              | Pearson's r | 0.168                     | -0.124   | 0.222               | —            |         |              |                 |                    |                  |              |
|                              | p-value     | 0.492                     | 0.612    | 0.362               | —            |         |              |                 |                    |                  |              |
| 5. True CC                   | Pearson's r | 0.371                     | -0.325   | 0.738***            | 0.038        | —       |              |                 |                    |                  |              |
|                              | p-value     | 0.118                     | 0.175    | < .001              | 0.878        | —       |              |                 |                    |                  |              |
| 6. Log Humidity              | Pearson's r | 0.414                     | 0.835*** | -0.017              | -0.111       | -0.044  | —            |                 |                    |                  |              |
|                              | p-value     | 0.078                     | < .001   | 0.946               | 0.652        | 0.859   | —            |                 |                    |                  |              |
| 7. Eff_Visual (BE)           | Pearson's r | 0.228                     | 0.294    | 0.127               | -0.107       | 0.301   | 0.203        | —               |                    |                  |              |
|                              | p-value     | 0.348                     | 0.222    | 0.603               | 0.663        | 0.210   | 0.404        | —               |                    |                  |              |
| 8. Log total moisture        | Pearson's r | 0.142                     | 0.601**  | -0.453              | 0.137        | -0.432  | 0.475*       | -0.064          | —                  |                  |              |
|                              | p-value     | 0.563                     | 0.006    | 0.052               | 0.575        | 0.064   | 0.040        | 0.796           | —                  |                  |              |
| 9. Wind_speed (m/s)          | Pearson's r | 0.346                     | 0.243    | -0.084              | 0.283        | 0.079   | 0.017        | 0.252           | 0.215              | —                |              |
|                              | p-value     | 0.147                     | 0.317    | 0.733               | 0.241        | 0.747   | 0.944        | 0.299           | 0.377              | —                |              |
| 10. ambient_temp             | Pearson's r | -0.424                    | -0.007   | -0.214              | -0.384       | -0.250  | -0.407       | 0.334           | -0.200             | 0.194            | —            |
|                              | p-value     | 0.070                     | 0.977    | 0.379               | 0.105        | 0.301   | 0.084        | 0.163           | 0.411              | 0.426            | —            |

\* p < .05, \*\* p < .01, \*\*\* p < .001
